# Supplementary material for: Plasma Cytokine Levels and Cytokine Genetic Polymorphisms in Patients with Metastatic Breast Cancer Receiving High-Dose Chemotherapy
Source: MDPI journal article supplement (doi:10.3390/immuno3010002), 2023-01-14
Supplement: s1 [file s1]

Supplementary Table S1. Plasma cytokine levels and determination of cutpoint concentrations

| plasma markers |         | N   | average | median | low | high   | cutpoint |
|----------------|---------|-----|---------|--------|-----|--------|----------|
| IL-RA1         | total   | 105 | 858.6   | 379.3  | 0   | 5842.1 | 300      |
|                | group 1 | 60  | 659.5   | 309.4  | 0   | 4755.2 |          |
|                | group2  | 45  | 1119.8  | 641.1  | 0   | 5842.1 |          |
| IL-1 $\beta$   | total   | 113 | 24.61   | 2.24   | 0   | 402.9  | 3        |
|                | group 1 | 60  | 16.1    | 2.1    | 0   | 240    |          |
|                | group2  | 53  | 34.2    | 2.2    | 0   | 402.9  |          |
| TNF $\alpha$   | total   | 113 | 102.4   | 16.7   | 0   | 821.4  | 60       |
|                | group 1 | 60  | 94.3    | 17.3   | 0   | 642.4  |          |
|                | group2  | 53  | 110.8   | 16.7   | 0   | 821.4  |          |
| IL-6           | total   | 94  | 45.41   | 10.51  | 0   | 429.8  | 18       |
|                | group 1 | 54  | 38.9    | 13.2   | 0.8 | 370.5  |          |
|                | group2  | 40  | 53.2    | 4.7    | 0   | 429.8  |          |
| IL-2           | total   | 101 | 44.97   | 0      | 0   | 927.8  | 3        |
|                | group 1 | 59  | 38.1    | 0.2    | 0   | 526.7  |          |
|                | group2  | 42  | 54.5    | 0      | 0   | 927.8  |          |

Supplementary Table S2. Identification of DNA probes used to detect cytokine SNPs

| Gene  | Gene Name                         | other names              | Polymorphism | Context Sequence [VIC/FAM]:                                      | SNP #                     |
|-------|-----------------------------------|--------------------------|--------------|------------------------------------------------------------------|---------------------------|
| IL1RN | interleukin 1 receptor antagonist |                          | A/G          | GGCCTTGGCTTCTGCTGAT<br>GGTGCC[A/G]TGTATTTAC<br>CAGACTTAGTGGTCCA  | <a href="#">rs579543</a>  |
| IL1RN | interleukin 1 receptor antagonist |                          | C/T          | TAAGTCTAAGATAGGGCA<br>GTAGCA[C/T]CAGGTCCAT<br>TTTGCAGCTGTCAAAA   | <a href="#">rs4251961</a> |
| IL1B  | interleukin 1 beta                | aka+3954                 | G/A          | TACCTTGGGTGCTGTTCTC<br>TGCCTC[G/A]GGAGCTCTC<br>TGTC AATTGCAGGAGC | <a href="#">rs16944</a>   |
| IL1B  | interleukin 1 beta                | aka-511                  | G/A          | CATAAGCCTCGTTATCCCA<br>TGTGTC[G/A]AAGAAGATA<br>GGTTCTGAAATGTGGA  | <a href="#">rs1143634</a> |
| IL6   | interleukin 6                     | IL-6-01, ex2C>G, aka-174 | C/G          | ACTTTTCCCCCTAGTTGTG<br>TCTTGC[C/G]ATGCTAAAG<br>GACGTCACATTGCACA  | <a href="#">rs1800795</a> |
| TNF   | tumor necrosis factor alpha       | TNF-02, -487A>G, aka-308 | A/G          | GAGGCAATAGGTTTTGAG<br>GGGCATG[A/G]GGACGGG<br>GTTCAGCCTCCAGGGTCC  | <a href="#">rs1800629</a> |

Supplementary Table S3. Patient clinicopathological characteristics and clinical outcome.

| Hormone receptor status   | breast cancer specific survival |                          |                       |                |       |        |                          |                       |                |        |         |                          |                       |                |      |
|---------------------------|---------------------------------|--------------------------|-----------------------|----------------|-------|--------|--------------------------|-----------------------|----------------|--------|---------|--------------------------|-----------------------|----------------|------|
|                           | total                           |                          |                       |                |       | Group1 |                          |                       |                |        | Group 2 |                          |                       |                |      |
|                           | N                               | median survival (months) | Hazard ratio (95% CI) | X <sup>2</sup> | p     | N      | median survival (months) | Hazard ratio (95% CI) | X <sup>2</sup> | p      | N       | median survival (months) | Hazard ratio (95% CI) | X <sup>2</sup> | p    |
| HER-2                     | 117                             | 28.4 vs 15.5             | 0.56 (0.38-0.83)      | 8.41           | 0.004 | 67     | 27.4 vs 12.7             | 0.51 (0.30-0.86)      | 6.28           | 0.012  | 50      | 31.1 vs 16.6             | 0.50 (0.27-0.93)      | 4.8            | 0.03 |
| Estrogen receptor         | 113                             | 13.7 vs 27.4             | 1.38 (0.92-2.06)      | 2.45           | 0.12  | 64     | 11.6 vs 28.4             | 1.50 (0.87-2.58)      | 2.09           | 0.15   | 49      | 14.4 vs 25.7             | 1.41 (0.77-2.56)      | 1.24           | 0.27 |
| Progesterone receptor     | 108                             | 15.2 vs 28.6             | 1.35 (0.91-2.00)      | 2.22           | 0.14  | 62     | 11.6 vs 28.4             | 1.52 (0.87-2.66)      | 2.19           | 0.14   | 46      | 17.9 vs 30.7             | 1.21 (0.66-2.22)      | 0.38           | 0.56 |
| Metastasis                |                                 |                          |                       |                |       |        |                          |                       |                |        |         |                          |                       |                |      |
| # metastatic sites        | 130                             | 26.6 vs 17.2             | 0.62 (0.43-0.91)      | 6.1            | 0.014 | 74     | 20.7 vs 17.5             | 0.68 (0.41-1.15)      | 2.07           | 0.15   | 56      | 28.1 vs 16.0             | 0.51 (0.29-0.90)      | 5.48           | 0.02 |
| Other                     | 130                             | 23.1 vs 17.5             | 0.65 (0.39-1.06)      | 3              | 0.08  | 74     | 19.9 vs 12.1             | 0.75 (0.40-1.43)      | 0.76           | 0.38   | 56      | 14.9 vs 22.4             | 0.59 (0.29-1.22)      | 2              | 0.16 |
| Lymph                     | 130                             | 21.4 vs 22.4             | 1.18 (0.91-1.71)      | 0.75           | 0.38  | 74     | 21.4 vs 22.4             | 1.07 (0.63-1.82)      | 0.07           | 0.79   | 56      | 20.8 vs 24.3             | 1.23 (0.71-2.13)      | 0.53           | 0.47 |
| Liver                     | 130                             | 25.1 vs 8.7              | 0.24 (0.12-0.48)      | 16.8           | 1E-04 | 74     | 25.1 vs 8.4              | 0.13 (0.04-0.36)      | 15             | 0.0001 | 56      | 25.3 vs 8.4              | 0.34 (0.14-0.82)      | 5.8            | 0.01 |
| Lung                      | 130                             | 25.3 vs 16.3             | 0.53 (0.35-0.82)      | 8.3            | 0.004 | 74     | 19.9 vs 20.3             | 0.76 (0.43-1.33)      | 0.93           | 0.33   | 56      | 28.1 vs 15.4             | 0.33 (0.17-0.65)      | 10.4           | 0    |
| Bone                      | 130                             | 15.1 vs 21.6             | 1.33 (0.93-1.89)      | 2.44           | 0.12  | 74     | 13.6 vs 27.5             | 1.34 (0.83-2.16)      | 1.5            | 0.23   | 56      | 17.4 vs 27.4             | 1.43 (0.83-2.47)      | 1.7            | 0.2  |
| progression-free survival |                                 |                          |                       |                |       |        |                          |                       |                |        |         |                          |                       |                |      |
| HER-2                     | 117                             | 12.5 vs 7.8              | 0.52 (0.35-0.78)      | 10.2           | 0.001 | 67     | 11.7 vs 6.9              | 0.44 (0.25-0.76)      | 8.82           | 0.003  | 50      | 12.9 vs 7.8              | 0.65 (0.36-1.16)      | 2.14           | 0.14 |
| Estrogen receptor         | 113                             | 6.9 vs 12.5              | 1.20 (0.81-1.78)      | 0.791          | 0.37  | 64     | 6.3 vs 13.2              | 1.58 (0.90-2.75)      | 2.55           | 0.11   | 49      | 8.3 vs 9.1               | 1.00 (0.56-1.78)      | 1E-04          | 0.99 |
| Progesterone receptor     | 108                             | 7.4 vs 11.2              | 1.12 (0.76-1.65)      | 0.31           | 0.58  | 62     | 6.3 vs 12.0              | 1.40 (0.81-2.44)      | 1.44           | 0.23   | 46      | 8.8 vs 10.6              | 0.85 (0.46-1.57)      | 0.268          | 0.6  |
| Metastasis                |                                 |                          |                       |                |       |        |                          |                       |                |        |         |                          |                       |                |      |
| # metastatic sites        | 130                             | 12.4 vs 8.0              | 0.50 (0.34-0.74)      | 12.1           | 5E-04 | 74     | 11.8 vs 8.4              | 0.54 (0.32-0.94)      | 4.83           | 0.28   | 56      | 12.4 vs 7.8              | 0.44 (0.25-0.79)      | 7.7            | 0.01 |
| Other                     | 130                             | 10.3 vs 8.6              | 0.54 (0.32-0.91)      | 5.3            | 0.02  | 74     | 10.4 vs 8.3              | 0.50 (0.25-1.04)      | 3.5            | 0.06   | 56      | 9.2 vs 8.2               | 0.57 (0.27-1.19)      | 2.26           | 0.13 |

---

|       |     |             |                  |      |       |    |             |                  |      |        |    |             |                  |      |      |
|-------|-----|-------------|------------------|------|-------|----|-------------|------------------|------|--------|----|-------------|------------------|------|------|
| Lymph | 130 | 10.4 vs 8.2 | 0.93 (0.64-1.38) | 0.11 | 0.74  | 74 | 12.4 vs 6.9 | 0.74 (0.42-1.32) | 1    | 0.31   | 56 | 8.7 vs 11.8 | 1.31 (0.76-2.24) | 0.95 | 0.33 |
| Liver | 130 | 10.7 vs 6.8 | 0.35 (0.19-0.66) | 10.5 | 0.001 | 74 | 10.9 vs 4.2 | 0.10 (0.03-0.28) | 17.8 | <0.001 | 56 | 10.6 vs 6.8 | 0.31 (0.13-0.77) | 6.4  | 0.01 |
| Lung  | 130 | 10.7 vs 8.0 | 0.57 (0.37-0.87) | 6.7  | 0.009 | 74 | 10.5 vs 9.3 | 0.76 (0.43-1.32) | 0.96 | 0.33   | 56 | 10.7 vs 6.9 | 0.41 (0.22-0.78) | 7.3  | 0.01 |
| Bone  | 130 | 7.4 vs 12.4 | 1.29 (0.91-1.84) | 1.9  | 0.16  | 74 | 6.9 vs 13.0 | 1.34 (0.83-2.16) | 1.4  | 0.23   | 56 | 8.8 vs 9.1  | 1.21 (0.71-2.07) | 0.5  | 0.48 |
